# Supplementary material for: In SilicoPrediction andIn VitroCharacterization of Multifunctional Human RNase3
Source: Hindawi journal article supplement (doi:10.1155/2013/170398), 2013-01-01

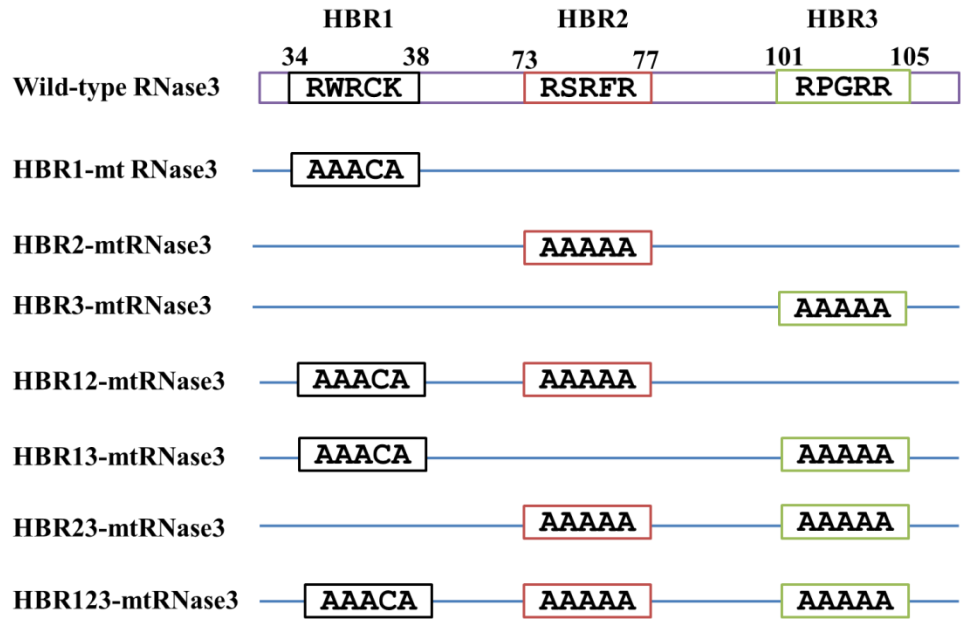

Supplement: f1 [file 170398.f1.pdf]
